## Integrating dynamic energy budget (DEB) theory with traditional bioenergetic models

R. M. Nisbet, M. Jusup, T. Klanjscek and L. Pecquerie

10.1242/jeb.071845

There was an error published in the online (Full Text and PDF) version of *J. Exp. Biol.* **215**, 892-902.

In Table 3 (p. 896), a typographical error was introduced into Eqns A3 and A4 during the production process. The correct version is given below.

Table 3. Equations of the standard DEB model

|     |                                                                                                                                                                                     |
|-----|-------------------------------------------------------------------------------------------------------------------------------------------------------------------------------------|
| A1  | $\frac{d}{dt} E = \dot{\rho}_A - \dot{\rho}_C$                                                                                                                                      |
| A2  | $\frac{d}{dt} V = \frac{1}{[E_G]} \dot{\rho}_G = \frac{1}{[E_G]} (\kappa \dot{\rho}_C - \dot{\rho}_S)$                                                                              |
| A3  | $\frac{d}{dt} E_H = (1 - \kappa) \dot{\rho}_C - \dot{\rho}_J \quad \text{if } E_H < E_H^p, \quad \text{else } \frac{d}{dt} E_H = 0$                                                 |
| A4  | $\frac{d}{dt} E_R = 0 \quad \text{if } E_H < E_H^p, \quad \text{else } \frac{d}{dt} E_R = (1 - \kappa) \dot{\rho}_C - \dot{\rho}_J$                                                 |
| A5  | with $\dot{\rho}_A = c(T) f(X) \{\dot{\rho}_{Am}\} L^2 \quad \text{if } E_H \geq E_H^p, \quad \text{else } \dot{\rho}_A = 0$                                                        |
| A6  | $\dot{\rho}_C = c(T) \{\dot{\rho}_{Am}\} L^2 \frac{ge}{g+e} \left( 1 + \frac{L}{gL_m} \right);$<br>with $e = \frac{[E]}{[E_m]} = \frac{E}{V \{\dot{\rho}_{Am}\}}$ and $L = V^{1/3}$ |
| A7  | $\dot{\rho}_S = c(T) ([\dot{\rho}_M] L^3 + \{\dot{\rho}_T\} L^2)$                                                                                                                   |
| A8  | $\dot{\rho}_J = c(T) \dot{\kappa}_J E_H$                                                                                                                                            |
| A9  | $f(X) = \frac{X}{X+K}$                                                                                                                                                              |
| A10 | $c(T) = \exp\left(\frac{T_A}{T_1} - \frac{T_A}{T}\right)$                                                                                                                           |

Notation is described in Table 2.

We apologise to all authors and readers for any inconvenience caused.

This error does not occur in the print version of this article.
